# Supplementary material for: The C10orf76–PI4KB axis orchestrates CERT-mediated ceramide trafficking to the distal Golgi
Source: PubMed Central journal article supplement (PMC10192306; doi:10.1083/jcb.202111069), 2023-05-17

**B**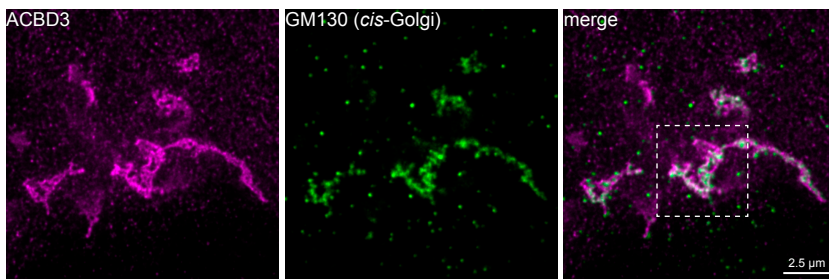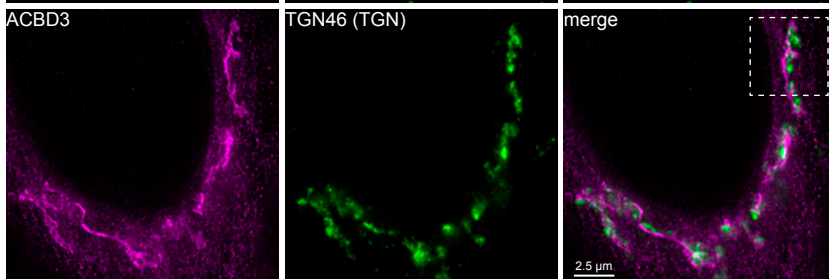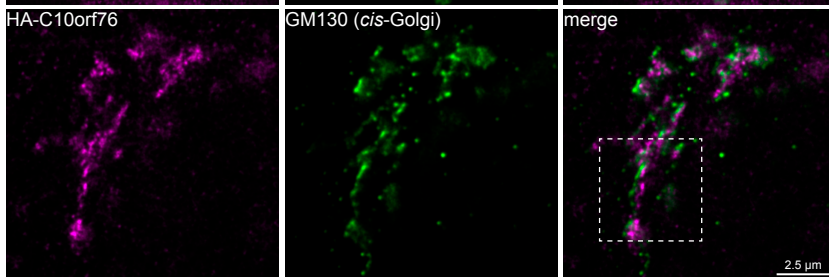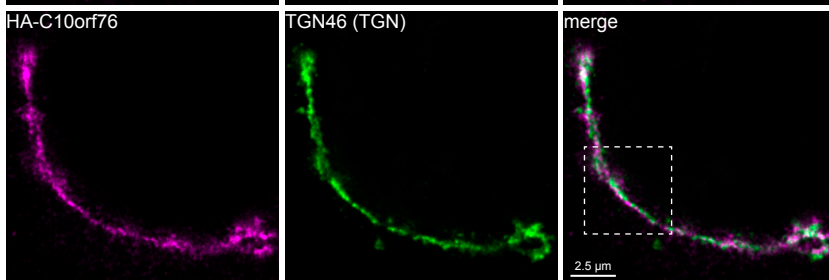**D**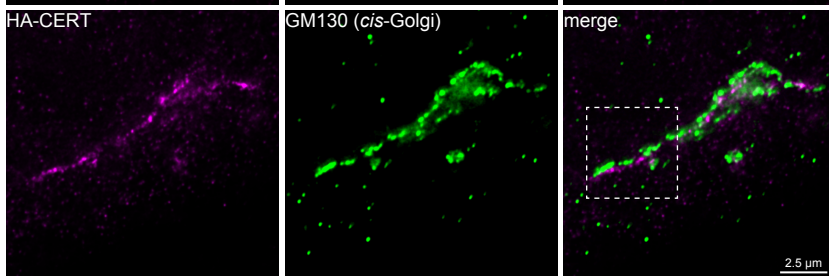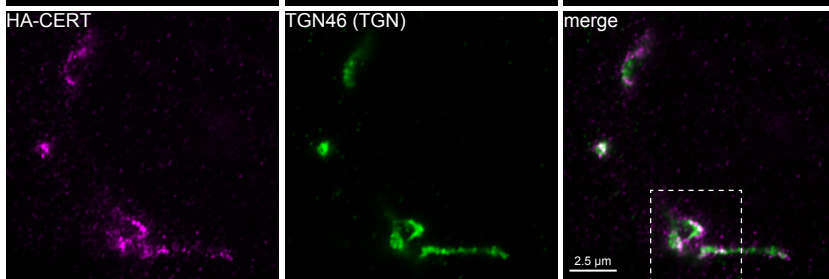

Supplement: JCB_202111069_SourceDataF5.pdf [file JCB_202111069_SourceDataF5.pdf]
