# Supplementary material for: The C10orf76–PI4KB axis orchestrates CERT-mediated ceramide trafficking to the distal Golgi
Source: PubMed Central journal article supplement (PMC10192306; doi:10.1083/jcb.202111069), 2023-05-17
Supplement: JCB_202111069_SourceDataFS3.pdf [file JCB_202111069_SourceDataFS3.pdf]

**A**

anti-CERT (-) myriocin

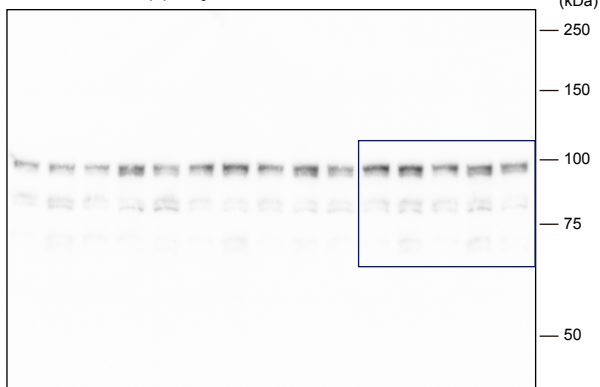

anti-CERT (+) myriocin

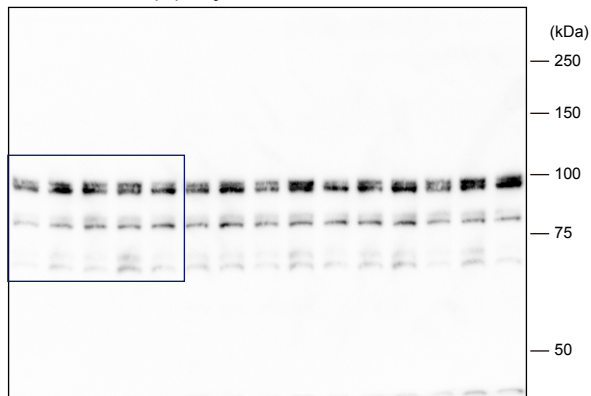

anti-GAPDH

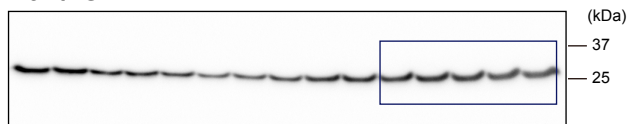

anti-GAPDH

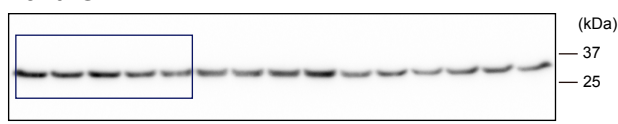

#1

#2

#3

parent  
PI4KB $\Delta$   
ACBD3 $\Delta$   
C10orf76 $\Delta$   
ACBD3 $\Delta$   
C10orf76 $\Delta$

#1

#2

#3

parent  
PI4KB $\Delta$   
ACBD3 $\Delta$   
C10orf76 $\Delta$   
ACBD3 $\Delta$   
C10orf76 $\Delta$

**B**

anti-FLAG

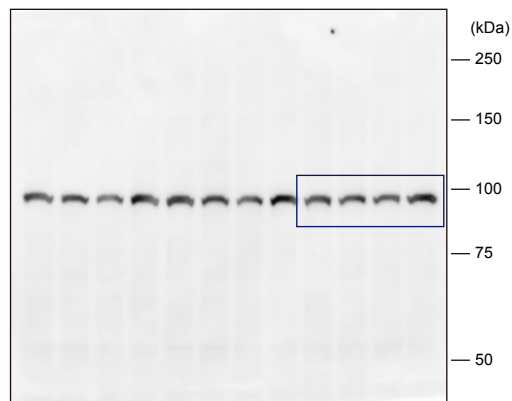

anti-GAPDH

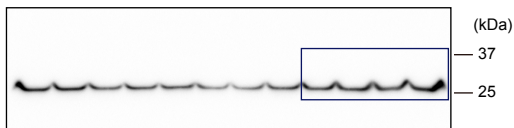

#1

#2

#3

PI4KB $\Delta$   
ACBD3 $\Delta$   
C10orf76 $\Delta$   
ACBD3 $\Delta$   
C10orf76 $\Delta$

PI4KB $\Delta$   
ACBD3 $\Delta$   
C10orf76 $\Delta$   
ACBD3 $\Delta$   
C10orf76 $\Delta$
